# Supplementary material
Source: Springer Nature journal article supplement (https://www.springermedizin.de/resource/supplementary/12933_2009_179_MOESM3_ESM.pdf/9539766)

**A**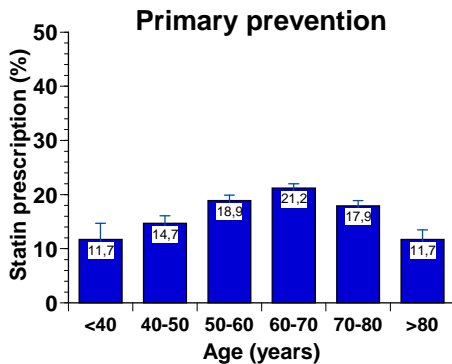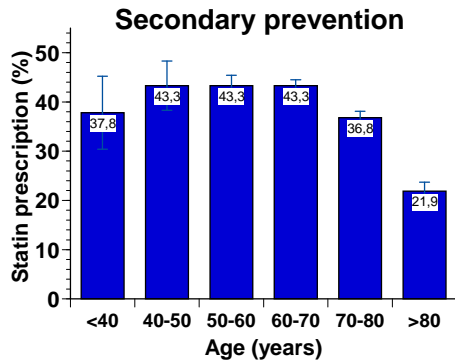**B**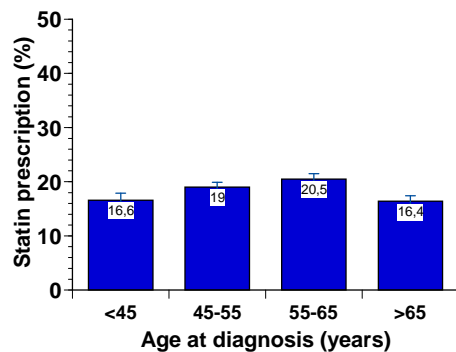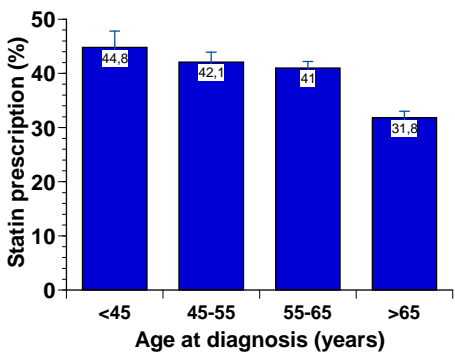**C**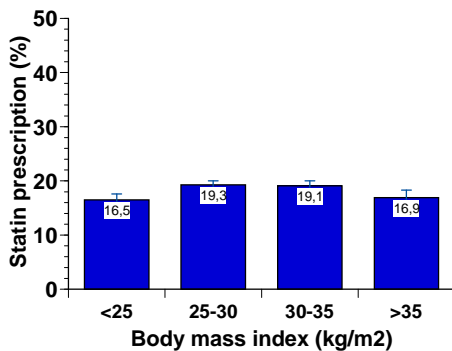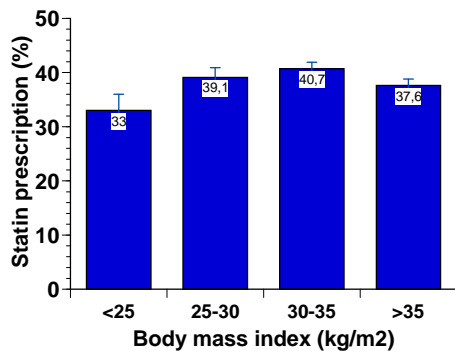

Supplement: MOESM3 [file 9539766]
